## **The role of the pre-commissural fornix in episodic autobiographical memory and simulation**

**Abbreviated title:** Pre-commissural fornix in past and future thinking

Angharad N. Williams<sup>1\*</sup>, Samuel Ridgeway<sup>1</sup>, Mark Postans<sup>1</sup>, Kim S. Graham<sup>1</sup>,  
Andrew, D. Lawrence<sup>1</sup> & Carl J. Hodgetts<sup>1, 2</sup>.

1. Cardiff University Brain Research Imaging Centre (CUBRIC), School of Psychology, Cardiff University, Maindy Road, Cardiff, CF24 4HQ, United Kingdom
2. Department of Psychology, Royal Holloway, University of London, Egham, Surrey, TW20 0EX

Corresponding author: Dr. Angharad Nia Williams, Cardiff University Brain Research Imaging Centre (CUBRIC), School of Psychology, Cardiff University, Maindy Road, Cardiff, CF24 4HQ, United Kingdom. E-mail:

[williamsan@cardiff.ac.uk](mailto:williamsan@cardiff.ac.uk)

Joint senior authors

**Number of pages:** 30

**Number of figures:** 6

**Number of tables:** 0

**Number of words:** Abstract (195); Introduction (650); Discussion (1500)

**Conflict of interest statement:** The authors declare no competing financial and non-financial interests.

### **Acknowledgments:**

This work was supported by funds from the Medical Research Council (MR/N01233X/1) (KG, AL, AW, MP) and a Wellcome Trust Strategic Award (104943/Z/14/Z) (KG, AL, CH). SR is supported via an ESRC Wales Doctoral Training Partnership PhD studentship. We would like to thank Ofer Pasternak and Greg Parker for providing the free water correction pipeline, John Evans for scanning support, and Naomi Warne for assisting with transcription and autobiographical memory task coding.

1 **Abstract**

2 Neuropsychological and functional magnetic resonance imaging (MRI) evidence  
3 suggests that the ability to vividly remember our personal past, and imagine future  
4 scenarios, involves two closely connected regions: the hippocampus and  
5 ventromedial prefrontal cortex (vmPFC). Despite evidence of a direct anatomical  
6 connection from hippocampus to vmPFC, it is unknown whether hippocampal-  
7 vmPFC structural connectivity supports both past and future-oriented episodic  
8 thinking. To address this, we applied diffusion-weighted magnetic resonance imaging  
9 (dMRI) and a novel deterministic tractography protocol to reconstruct distinct  
10 subdivisions of the fornix previously detected in axonal tracer studies, namely pre-  
11 commissural (connecting the hippocampus to vmPFC) and post-commissural (linking  
12 the hippocampus and medial diencephalon) fornix, in a group of healthy young adult  
13 humans who undertook an adapted past-future autobiographical interview. As  
14 predicted, we found that inter-individual differences in pre-commissural - but not  
15 post-commissural - fornix microstructure (fractional anisotropy) was significantly  
16 correlated with the episodic richness of both past *and* future autobiographical  
17 narratives. Notably, these results remained significant when controlling for both non-  
18 episodic narrative content and grey matter volumes of the hippocampus and vmPFC.  
19 This study provides novel evidence that reconstructing events from one's personal  
20 past, and constructing possible future events, involves a distinct, structurally-  
21 instantiated hippocampal-vmPFC pathway.

22

23 **Keywords:**

24 Hippocampus, Episodic memory, Future thinking, Structural connectivity, vmPFC,  
25 White matter tractography

26

27 **Significance Statement**

28 A novel anatomically-guided protocol that allows the pre-commissural and post-  
29 commissural fornix fibers to be separately reconstructed *in vivo* (Christiansen et al.,  
30 2016) was applied to reconstruct the pre-commissural subdivision of the white  
31 matter fornix tract (anatomically linking the hippocampal formation to the vmPFC)  
32 and investigate its contribution to episodic memory and future simulation. We  
33 demonstrated that the amount of episodic details contained in past and future  
34 narratives, collected via an adapted autobiographical interview, was positively  
35 correlated with pre-, but not post-, commissural fornix microstructure. These findings  
36 highlight how inter-individual variation in the pre-commissural subdivision of the  
37 fornix underpins the construction of self-reflective, contextual events – for both the  
38 past and future.

39

## 40 **Introduction**

41 A key adaptive feature of human cognition is the ability to re-experience our personal  
42 histories and imagine the future in vivid detail. According to the constructive episodic  
43 simulation hypothesis, the processes and neural machinery that allow us to  
44 remember past experiences also allow us to imagine future experiences (Schacter et  
45 al., 2012; Addis, 2018). Consistent with this view, remembering past and imagining  
46 future events activate a common set of brain regions, including the hippocampus and  
47 ventromedial prefrontal cortex (vmPFC) (Addis et al., 2007; Benoit and Schacter,  
48 2015). Furthermore, the ability to retrieve episodically rich autobiographical  
49 memories and construct coherent future simulations is diminished following lesions  
50 to both the hippocampus and vmPFC (Race et al., 2011; McCormick et al., 2018)  
51 (but see Squire et al., 2010). Such findings have led to the suggestion that the  
52 hippocampus and vmPFC are critical nodes within a default (Andrews-Hanna et al.,  
53 2010; Raichle, 2015) or 'core' network that interact to support autobiographical  
54 memory and imagination (Schacter et al., 2012; Schacter et al., 2017) (For related  
55 proposals see also Murray et al., 2017; Robin and Moscovitch, 2017; McCormick et  
56 al., 2018).

57  
58 Converging evidence has shifted focus towards this neural network-level approach to  
59 support the way we reconstruct our personal past and construct possible future  
60 experiences (Schacter et al., 2012; Bellana et al., 2017; Schacter et al., 2017). For  
61 instance, studies using functional magnetic resonance imaging (fMRI) have found  
62 increased functional connectivity between the hippocampus and vmPFC during both  
63 the retrieval of autobiographical memories (McCormick et al., 2015) and the  
64 construction of episodic future events (Campbell et al., 2017), and resting state  
65 functional connectivity between these regions has been shown to predict the  
66 episodic quality of individual's memories (Yang et al., 2013).

67  
68 The communication of information across networked areas depends on the  
69 organization and integrity of the white matter connections between them (Jbabdi and  
70 Behrens, 2013). Invasive tract-tracing techniques have revealed direct efferent  
71 anatomical connections from the hippocampus to the vmPFC. In rats, the entire  
72 longitudinal extent of the subiculum/CA1 is connected - via the pre-commissural  
73 fornix - with the vmPFC, with connectivity increasing progressively in strength from

74 dorsal to ventral hippocampus (Jay and Witter, 1991; Cenquizca and Swanson,  
75 2007). Similarly in primates, the pre-commissural fornix provides the exclusive route  
76 for subiculum/CA1 projections to medial and orbitofrontal PFC (Barbas and Blatt,  
77 1995; Aggleton et al., 2015), with relatively more projections arising from the anterior  
78 hippocampus. In humans, diffusion-weighted magnetic resonance imaging (dMRI),  
79 which can non-invasively delineate the path of major fiber pathways and evaluate  
80 their microstructure through indices such as fractional anisotropy (FA) (Jbabdi and  
81 Behrens, 2013), has provided initial evidence for hippocampus-PFC connections via  
82 the fornix (Croxson et al., 2005). Building on this work, Christiansen et al. (2016)  
83 recently developed an anatomically guided dMRI protocol for the selective *in vivo*  
84 reconstruction of pre-commissural fornix fibers in humans, allowing investigation of  
85 the functions supported by human hippocampus-PFC structural connectivity for the  
86 first time.

87

88 By application of this novel anatomically-informed tractography protocol, we  
89 investigated the role of the pre-commissural fornix in autobiographical past and  
90 future thinking using an individual differences design (Palombo et al., 2018a).  
91 Participants were asked to recall past experiences and generate future events using  
92 word-cues according to a modified Galton-Crovitz cue-word paradigm (Crovitz and  
93 Schiffman, 1974). White matter microstructure was assessed in these individuals  
94 using high angular resolution diffusion-weighted imaging (HARDI) and constrained  
95 spherical deconvolution tractography (Dell'Acqua and Tournier, 2019). Given the  
96 directed hippocampus-PFC functional connections identified above in relation to  
97 (re)constructing events in episodic memory and episodic simulation (McCormick et  
98 al., 2015; Campbell et al., 2017), we hypothesized that individual differences in the  
99 episodic richness of past and future thinking would be related to the microstructure of  
100 the hippocampus-PFC connections underpinned by the pre-commissural fornix. As a  
101 comparison tract, we used the post-commissural fornix, which connects  
102 hippocampus to mammillary bodies and anterior thalamic nuclei (Aggleton, 2012;  
103 Christiansen et al., 2016; Mathiasen et al., 2019).

104

## 105 **Materials and methods**

### 106 **Participants**

107 Participants were 27 healthy Cardiff University undergraduates (aged 18–22 years,  
108 mean age = 19, 25 females). Portions of this data have been published previously  
109 (Hodgetts et al., 2017a). Here we address a novel and distinct question with  
110 unpublished data from a future thinking task and a novel anatomically-informed  
111 tractography protocol for reconstructing distinct fornix sub-divisions. Participants  
112 completed an adapted autobiographical cue-word paradigm (Crovitz and Schiffman,  
113 1974; Addis et al., 2008) in a separate session from diffusion-weighted magnetic  
114 resonance imaging (dMRI). All participants gave written informed consent before  
115 participating. Cardiff University School of Psychology Research Ethics Committee  
116 reviewed and approved this research.

117

### 118 **Experimental Design**

#### 119 **Past-future Autobiographical Interview (AI) task procedure**

120 Participants completed an adapted autobiographical cue-word paradigm (Crovitz and  
121 Schiffman, 1974; Addis et al., 2008) that probed both past and future events. In each  
122 of the two conditions (past, future), ten cue-words (e.g. “holiday”, “birthday”) were  
123 provided to each participant, in response to which they were asked to recall or  
124 imagine a personal event and to generate as much detail as possible within 1-minute  
125 (Cole et al., 2012). Each event was required to be spatiotemporally specific,  
126 occurring over a timescale of minutes or hours, but no longer than a day. Future  
127 events were required to be plausible given the participant’s current plans and not  
128 previously experienced by the participant. Three alternate word lists were used;  
129 these were matched for semantic category (i.e., participants either heard the cue-  
130 word ‘holiday’, ‘journey’ or ‘vacation’). Prior to commencing, participants were  
131 instructed:

132 *“In this test I am going to give you a series of words and ask you to recall an episode*  
133 *from your past, or think of an episode that you might be involved in in the future,*  
134 *related to each of these words. The episode needs to be as specific and detailed as*  
135 *possible. I would like you to give me as much information as you can.”*

136

137 In cases where the participant either lacked specificity or detail in their description,  
138 the experimenter would provide a non-specific prompt for further information (e.g., “Is

139 *there anything else you can tell me about this event?”*). All trials for one temporal  
140 direction (past or future) were completed before beginning the trials for the other  
141 condition. Order of presentation of temporal direction (past or future) was  
142 counterbalanced, as were the word lists (across the past and future conditions).  
143 Participants were tested individually, and responses were recorded using a portable  
144 recording device (Zoom H1 Digital Field Recorder) for subsequent transcription and  
145 scoring.

146

### 147 **Scoring**

148 The standardized AI scoring procedure (Levine et al., 2002) was used. Events (past  
149 and future) generated were segmented into distinct chunks of information in order to  
150 allow analysis of the levels of episodic or semantic information provided within each.  
151 These chunks were typically characterized by grammatical clauses that referenced a  
152 unique occurrence, observation or thought (Levine et al., 2002). Two broad  
153 categories were used to categorize details: ‘internal’ details (which described the  
154 central event) and ‘external’ details (decontextualized information, including semantic  
155 details and information concerning extended events that are not specific in time and  
156 place, and repetitions). In the case that a participant described more than one event,  
157 the event that was described in the most detail was coded as ‘internal’ and the other  
158 as ‘external’. The central event was required to refer to a specific time and place,  
159 thus it can be considered ‘episodic’ and will be referred to as such henceforth.  
160 Episodic details included not only time and place details, but also any other episodic  
161 information (sensory details, thoughts and emotions) that were part of the central  
162 event (Levine et al., 2002). **Figure 1** contains examples of external and episodic  
163 details from past and future narratives. Total score was computed by summing over  
164 the 10 event narratives.

165

## Past narrative

**External** Vacation um I went to India (.) **External** Saw some elephants (,) **External** my sister got married out there (,) Um (.)  
**External** We went to the beach (.) **External** Went to Panaji the capital of Goa (.) **External** Um saw the bridge where it was (,)  
**External** in one of the Bourne Identity films or something (.) **External** Erm that's not for me but the boys liked it (.)  
**External** Um (.) Yeah went for lots of dinners (.)

**Episodic** Um (.) My sister when she got married (,) **Episodic** she looked really nice (,) **Episodic** and we were er on the beach (,)  
**Episodic** and we had the waves coming in (.) **Episodic** And it was sunset (,) **Episodic** and we had like a white gazebo (.) **Episodic** And  
**Episodic** her dress was kind of floating around erm in the wind (,) **Episodic** and then we all jumped into the sea (,)  
**Episodic** and had our pictures taken (.)

## Future narrative

**External** Erm in a couple of weeks (,) **External** I'm going to go on holiday (,) **External** um to Cyprus (.) **External** My stepsister is getting  
**Episodic** married out there (,) **Episodic** and so we're um going to have the wedding on um the beach front (,) **Episodic** um a lot  
**Episodic** of her friends and family are going (,) **Episodic** um and I'm gonna be a bridesmaid (.) **External** Um the weather's  
**External** supposed to be really nice out there (.) **External** Um and erm mmm yeah there's about 20 people going (.)  
**External** It's gonna be quite a small wedding (.) **Episodic** Um and um yeah we're gonna have dinner at the hotel (.)

166

167

168 **Figure 1.** Examples of external and episodic details from past and future narratives.

169

170 Consensus scoring was established based on the near perfect inter-rater reliability  
171 from two raters who scored the past events (intra-class correlation analysis, two-way  
172 random model: episodic  $r = 0.99$ ; external  $r = 1.0$ ). The values from one primary  
173 coder, who completed both the past and future scoring, were used in the analysis. All  
174 raters were blind to dMRI results.

175

176 For each event the numbers of episodic and external details were tallied, and the  
177 totals were then summed across the 10 events in each condition (past, future) to  
178 create episodic and external AI scores for each condition for each participant.

179



## 180 **MRI data acquisition**

181 Imaging data were acquired using a General Electric Healthcare (GE) 3-T HDx MRI  
182 system with an 8-channel receive-only head coil, at Cardiff University's Brain  
183 Research Imaging Centre (CUBRIC). A standard T1-weighted 3D FSPGR sequence  
184 (178 axial slices, 1mm isotropic resolution, TR/TE = 7.8/3.0s, FOV = 256 x 256 x  
185 176mm, 256 x 256 x 176 data matrix, 20° flip angle) provided high-resolution  
186 anatomical images.

187

188 A diffusion weighted single-shot spin-echo Echo-Planar Imaging (EPI) pulse  
189 sequence was used to acquire whole-brain High Angular Resolution Diffusion Image  
190 (HARDI) data (60 contiguous slices acquired along an oblique-axial plane with  
191 2.4mm thickness and no gap, TE = 87ms; voxel dimensions = 2.4 x 2.4 x 2.4mm<sup>3</sup>;  
192 FOV = 23 x 23 cm<sup>2</sup>; 96 x 96 acquisition matrix). The acquisition was cardiac gated,  
193 with 30 isotropic directions at b = 1200 s/mm<sup>2</sup>. In addition, three non-diffusion  
194 weighted images were acquired with b = 0 s/mm<sup>2</sup>.

195

## 196 **MRI preprocessing**

### 197 **Diffusion MRI**

198 dMRI data were preprocessed using ExploreDTI version 4.8.3 (Leemans and Jones,  
199 2009). Distortions resulting from eddy currents and participant head motion were  
200 corrected. A particular issue for white matter pathways located near the ventricles  
201 (e.g., the fornix), is free water contamination from cerebrospinal fluid. This has been  
202 shown to significantly affect tract delineation (Concha et al., 2005). Thus, to correct  
203 for voxel-wise partial volume artifacts arising from free water contamination, the two-  
204 compartment 'Free Water Elimination' (FWE) procedure (Pasternak et al., 2009) was  
205 applied – this improves Diffusion Tensor Imaging (DTI)-based tract reconstruction  
206 and tissue specificity (Pasternak et al., 2014). Following FWE, corrected diffusion  
207 tensor indices were computed. Fractional anisotropy (FA) – a DTI-based index  
208 proposed to reflect axonal organization (Pierpaoli et al., 1996), reflects the extent to  
209 which diffusion within biological tissue is anisotropic (constrained along a single axis)  
210 (Beaulieu, 2002). FA values can range from 0 (fully isotropic) to 1 (fully anisotropic).  
211 The resulting free water corrected FA maps were inputs for the tractography  
212 analysis.

213

## 214 **Tractography**

215 Deterministic tractography was performed from all voxels based on constrained  
216 spherical deconvolution (CSD) (Jeurissen et al., 2011; Dell'Acqua and Tournier,  
217 2019). CSD allows for the representation of bending/crossing/kissing fibers in  
218 individual voxels, as multiple peaks in the fiber orientation density function (fODF)  
219 can be extracted within each voxel (Dell'Acqua and Tournier, 2019). The step size  
220 was 1mm, and the fODF amplitude threshold was 0.1. An angle threshold of 30° was  
221 used to prevent the reconstruction of anatomically implausible fibers.

222

223 To generate 3D fiber reconstructions of each tract segment, waypoint region-of-  
224 interest (ROI) gates were drawn manually onto whole-brain free water corrected FA  
225 maps. The waypoint ROIs defined the tracts based on a 'SEED' point and Boolean  
226 logical operations: 'NOT' and 'AND'. The 'NOT' and 'AND' gates corresponded to  
227 whether tracts passing through were omitted from analyses or retained, respectively.  
228 These gates were combined to reconstruct the tracts, based on anatomical  
229 plausibility. Initially, a multiple ROI approach was applied to reconstruct the fornix  
230 (see Metzler-Baddeley et al., 2011; Hodgetts et al., 2017a).

231

## 232 **Fornix reconstruction**

233 A 'SEED' point ROI was placed on the coronal plane, encompassing the body of the  
234 fornix. An 'AND' ROI was placed on the axial plane, capturing the crus fornici in both  
235 hemispheres at the lower part of the splenium of the corpus callosum. 'NOT' ROIs  
236 were placed intersecting the corpus callosum on the axial plane, and anterior to the  
237 fornix pillars and posterior to the crus fornici on the coronal plane. Further 'NOT'  
238 way-gates were placed after the initial reconstruction and ensuing visual inspection,  
239 to remove anatomically implausible fibers. Subsequently, the anterior body of the  
240 fornix was split into the pre- and post- commissural column segments (**Figure 2**).

241

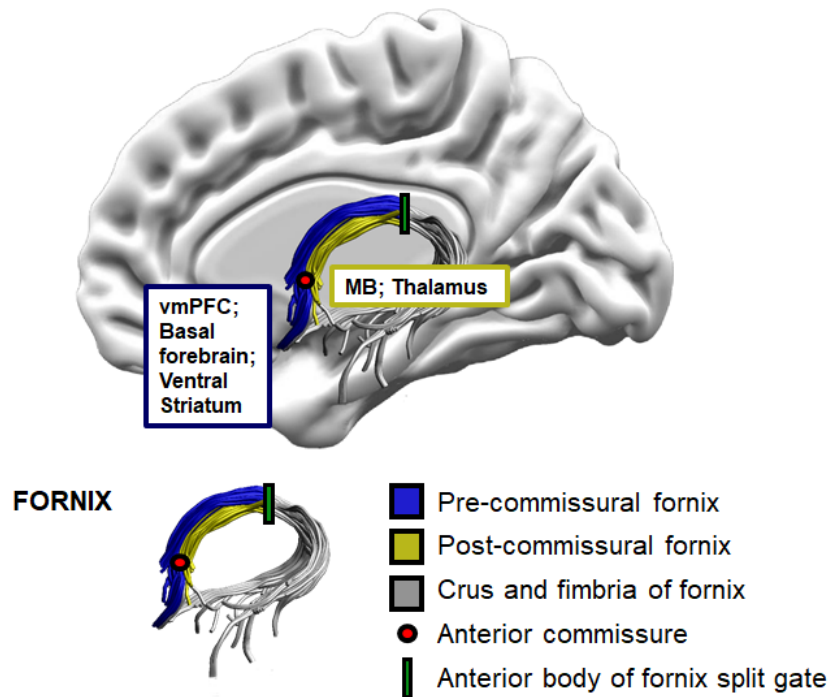

242

243 **Figure 2.** Schematic illustration of the anatomical landmarks for fornix tract sub-  
244 division, and the connecting areas of interest. vmPFC = Ventromedial Prefrontal  
245 Cortex; MB = Mammillary Bodies.

246

247 Waypoint ROIs for the pre-post split (**Figure 3**) were based on the protocol  
248 described in Christiansen et al. (2016), and example tract reconstructions are  
249 depicted in **Figure 4**. After tract reconstruction for each participant, mean FA values  
250 were calculated by averaging the values at each 1mm step along each segment.

251

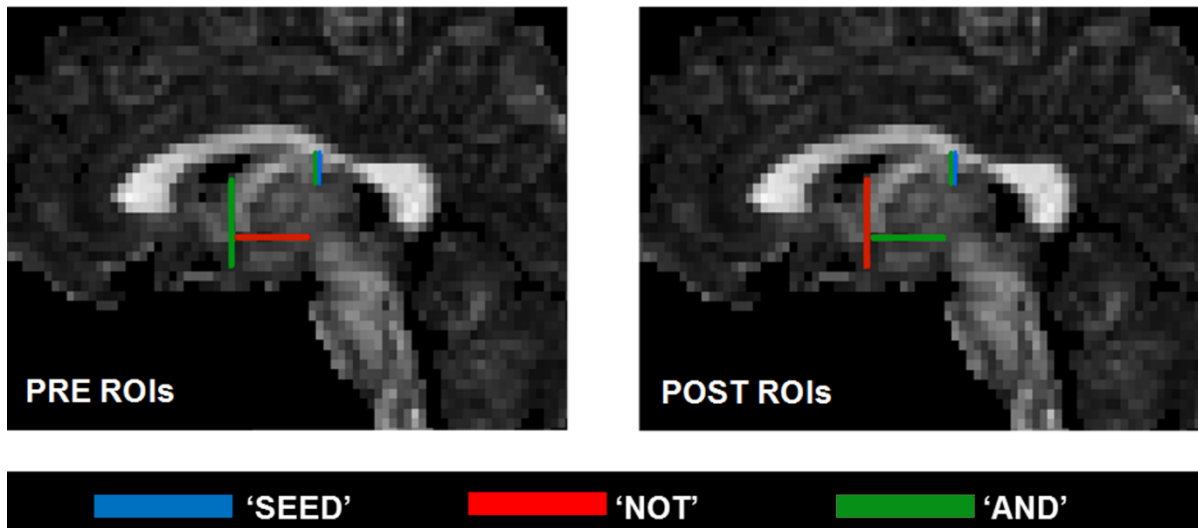

252

253 **Figure 3.** Waypoint region-of-interest (ROI) gates used for reconstructing the pre- and post- commissural fornix tract segments (Blue = SEED, Red = NOT, Green =

254

255

256

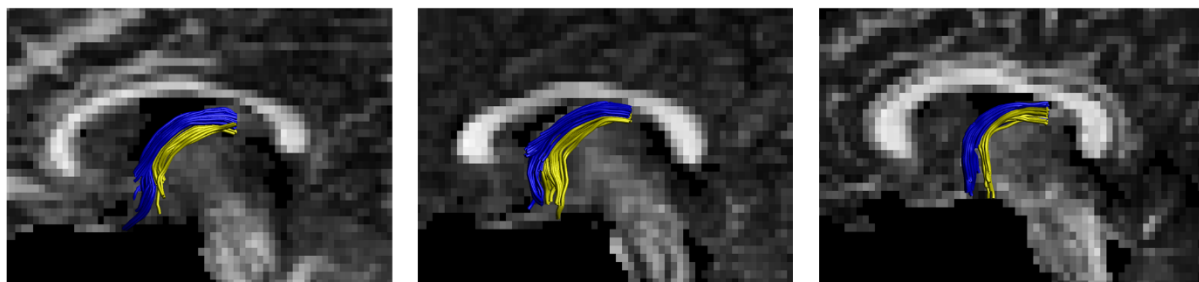

257

258 **Figure 4.** Example reconstructions for the pre- and post- commissural fornix

259

260

### 261 **Pre- and post- commissural fornix reconstruction**

262 The fornix was split, isolating the anterior-body, by an 'AND' gate positioned at the

263 point of the downward bend to the crus and fimbria of the fornix. In line with

264 Christiansen et al. (2016), fibers of the crus and fimbria of the fornix were excluded

265 from the anterior-body and hence pre- and post- commissural fornix reconstructions.

266 Partial volume effects due to the intermingling of the two fiber populations beyond

267 the crus were, therefore, minimized (Saunders and Aggleton, 2007). In addition, this

268 procedure avoided 'jumping' where tract voxels that pass close to, or across,

269 neighboring tract voxels 'jump' onto them (Jones and Cercignani, 2010). This split

270 was conducted using the tract segmentation tool "splitter" within ExploreDTIv4.8.3.

271

272 The anterior-body of the fornix was then divided into the pre- and post-commissural  
273 segments. This delineation took advantage of the manner in which the fibers  
274 separate at the anterior columns of the fornix. At this level, the segments contain  
275 approximately the same number of fibers (Powell et al., 1957). The pre-commissural  
276 fornix was delineated by positioning an additional 'AND' gate on the coronal plane at  
277 the anterior-commissure, as well as an additional 'NOT' gate meeting this 'AND' gate  
278 on the axial plane. For the post-commissural fornix reconstruction, the additional  
279 'NOT' and 'AND' gates placed for reconstruction of the pre-commissural fornix were  
280 swapped (see **Figure 3**). Thus, for the pre-commissural fornix, tracts were included  
281 only if they extended anterior to the anterior commissure, and for the post-  
282 commissural fornix only tracts running posterior to the anterior commissure were  
283 retained (see **Figure 4**) (Christiansen et al., 2016).

284

### 285 **Grey matter volumetrics**

286 T1-weighted images were corrected for spatial intensity variations using FMRIB's  
287 Automated Segmentation Tool (FAST; Zhang et al., 2001). Bilateral grey matter  
288 volumes (expressed as a proportion of estimated total intracranial volume) of the  
289 hippocampus were subsequently obtained using FMRIB's Integrated Registration &  
290 Segmentation Tool (FIRST; Patenaude et al., 2011). Volumes for the vmPFC ROI  
291 were derived using FreeSurfer ([surfer.nmr.mgh.harvard.edu](http://surfer.nmr.mgh.harvard.edu); Destrieux et al., 2010),  
292 via summing volumes of the medial orbitofrontal cortex (mOFC) and rostral anterior  
293 cingulate cortex (rACC) parcels. One participant was removed from the grey matter  
294 analyses due to poor overall data quality on the T1 FSPGR.

295

## 296 **Statistical Analysis**

297 As higher values of FA are considered indicative of increased myelination and  
298 improved organization, cohesion, and compactness of white matter fiber tracts  
299 (Beaulieu, 2002), we predicted a positive association between pre-commissural FA  
300 and the episodic richness of past and future constructions. Thus, directional  
301 Pearson's correlations were conducted between individual's total scores of episodic  
302 and external details produced for the ten past and future narratives; and individual's  
303 episodic past and future scores and their FA values for the pre- and post-  
304 commissural fornix (Lakens, 2016). Vovk-Sellke Maximum (VS-MPR)  $p$  -ratios were  
305 computed: based on the  $p$  -value, the maximum possible odds in favor of  $H_1$  over  $H_0$   
306 equals  $1/(-e p \log(p))$  for  $p \leq .37$ , where  $\log$  is the natural logarithm and  $e$  is its  
307 constant base (Benjamin and Berger, 2019). I.e. the VS-MPR represents the largest  
308 odds in favor of the alternative hypothesis relative to the null hypothesis that is  
309 consistent with the observed data (Benjamin and Berger, 2019). Complementary  
310 non-parametric Spearman's rho rank tests were also conducted for the key  
311 correlations. These are less sensitive to potential outliers and differences in range  
312 (Croux and Dehon, 2010). In addition, partial correlations were conducted for the key  
313 episodic-fornix microstructure correlations, to control for the contribution of the  
314 number of external details given and regional grey matter volume. All analyses were  
315 conducted in JASP (2018, version 0.9.1.0).

316

## 317 **Results**

### 318 **Correlations between tract microstructure and past-future AI scores**

#### 319 *Number of details produced (episodic and external) for the past and future narratives*

320 Consistent with previous studies (e.g. Addis et al., 2008; Addis et al., 2009; Race et  
321 al., 2011), the total number of episodic details (summed across the 10 cue words) an  
322 individual recalled for the past (mean = 121.3, median = 114, SD = 40.8, range = 64  
323 - 247) correlated strongly with the number of episodic details imagined for the future  
324 (mean = 59.3, median = 54, SD = 23.4, range = 27 - 105) (**Figure 5A**. Pearson's  $r =$   
325 0.69,  $p < 0.001$ , VS-MPR = 1027.33). Additionally, in line with previous studies, there  
326 were significantly more episodic details given for the past in comparison to the future  
327 ( $t(26) = 10.75$ ,  $p < 0.001$ ,  $d_z = 2.07$ , paired t-test). The number of external details an  
328 individual recalled for the past (mean = 73.8, median = 71, SD = 39, range = 20 –  
329 182) also correlated significantly with the number of external details imagined for the

330 future (mean = 86.5, median = 75, SD = 40.8, range = 23 - 198) (**Figure 5B**.  
331 Pearson's  $r = 0.73$ ,  $p < 0.001$ , VS-MPR = 3254.64). There were also significantly  
332 more external details given for the future in comparison to the past ( $t(26) = 2.23$ ,  $p =$   
333  $0.035$ ,  $d_z = 0.43$ , paired t-test). The number of episodic details an individual recalled  
334 for the past also correlated with the number of external details recalled for the past  
335 (Pearson's  $r = 0.35$ ,  $p = 0.035$ , VS-MPR = 3.15); this was not the case, however, for  
336 the future (Pearson's  $r = -0.16$ ,  $p = 0.783$ , VS-MPR = 1.00).  
337  
338

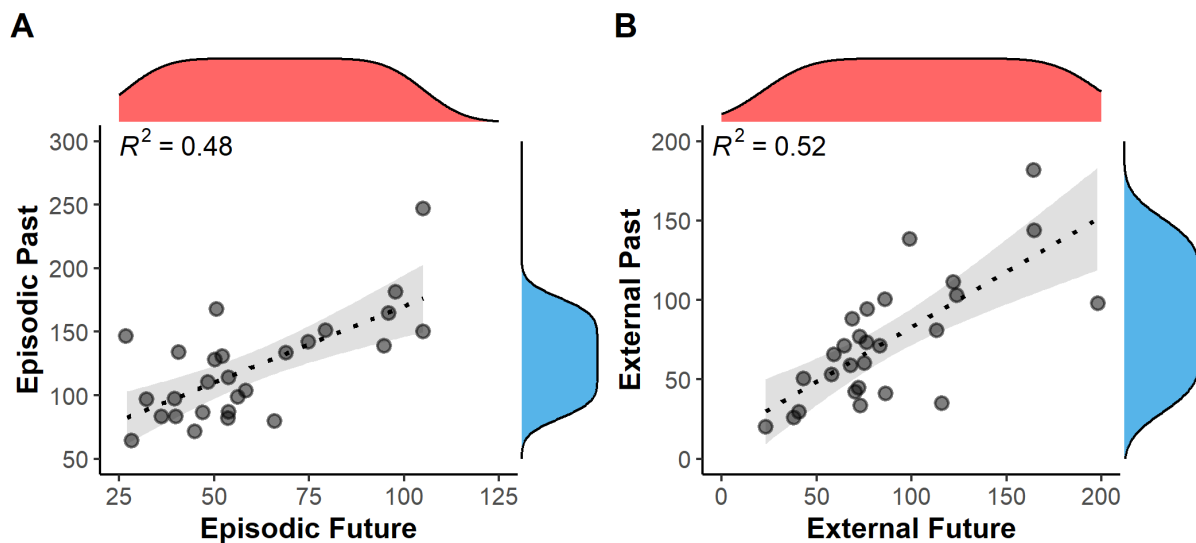

339  
340 **Figure 5 (A, B)**. Scatterplots depicting correlations between the number of details  
341 produced for the past versus the future AI narratives (A. Episodic, B. External)  
342 ( $N=27$ ). Marginal density is displayed on the opposite axis. Grey shading equals the  
343 95% CI.

#### 344 345 *Episodic past details and pre-/post- commissural fornix FA*

346 We found a significant positive correlation between the number of past episodic  
347 details and pre-commissural fornix FA (**Figure 6A**. Pearson's  $r = 0.49$ ,  $p = 0.005$ ,  
348 VS-MPR = 14.49, Spearman's  $\rho = 0.464$ ,  $p = 0.007$ , VS-MPR = 10.09). There was  
349 no significant correlation between post-commissural fornix FA and episodic past  
350 details (**Figure 6B**. Pearson's  $r = -0.12$ ;  $p = 0.725$ , VS-MPR = 1.00, Spearman's  $\rho$   
351  $= 0.02$ ,  $p = 0.457$ , VS-MPR = 1.00). The correlation between episodic past details  
352 and pre-commissural fornix FA was significantly greater than between episodic past

353 details and post-commissural fornix FA (Steiger  $z(27) = 2.29$ ,  $p = 0.011$ ) (computed  
354 using R package 'cocor', Diedenhofen and Musch, 2015).

355

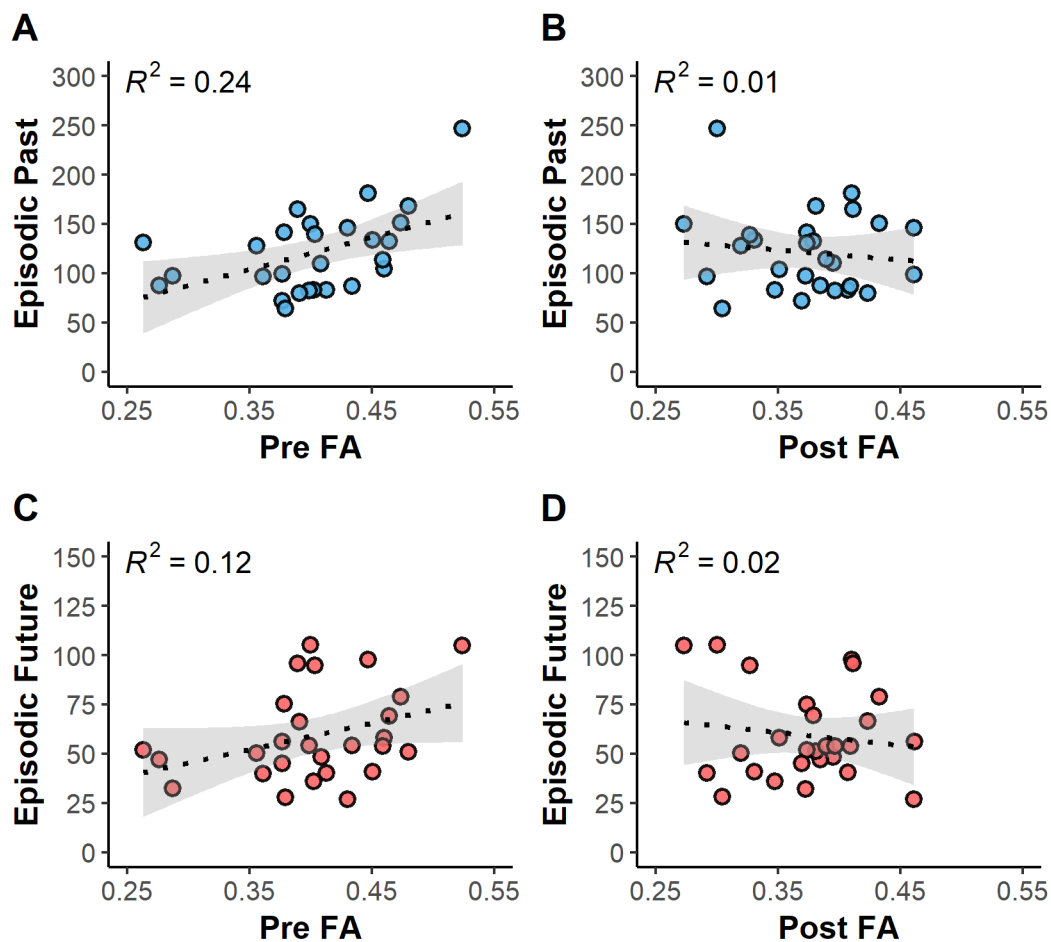

356

357 **Figure 6 (A-D).** Scatterplots depicting the correlations of episodic past (A, B) and  
358 future (C, D) AI details with pre-/post- commissural fornix microstructure (fractional  
359 anisotropy, FA). Number of episodic past/future details (summed over 10 cue words)  
360 is plotted on the y-axis ( $N=27$ ). Grey shading equals the 95% CI.

361

362 The correlation between episodic past details and pre-commissural fornix FA was  
363 also significantly greater than between external past details and pre-commissural  
364 fornix FA (Steiger  $z(27) = 1.69$ ,  $p = 0.046$ ). Additionally, when controlling for the  
365 number of external details produced by the individual, the correlation between  
366 episodic past details and pre-commissural fornix FA remained significant (Pearson's  
367  $r = 0.48$ ,  $p = 0.007$ , Spearman's  $\rho = 0.47$ ,  $p = 0.007$ ).

368

369



### 370 *Episodic future details and pre-/post- commissural fornix FA*

371 The findings for the episodic future simulation details mirrored those for the episodic  
372 past retrieval. There was a significant positive correlation between the total number  
373 of future episodic details (summed over the 10 cue words) and pre-commissural  
374 fornix FA (**Figure 6C**. Pearson's  $r = 0.35$ ,  $p = 0.035$ , VS-MPR = 3.11, Spearman's  
375  $\rho = 0.33$ ,  $p = 0.045$ , VS-MPR = 2.62), and, correspondingly, there was no  
376 significant correlation between episodic future details and post-commissural fornix  
377 FA (**Figure 6D**. Pearson's  $r = -0.14$ ,  $p = 0.752$ , VS-MPR = 1.00, Spearman's  $\rho =$   
378  $0.09$ ,  $p = 0.330$ , VS-MPR = 1.01). The correlation between episodic future details  
379 and pre-commissural fornix FA was also significantly greater than between episodic  
380 future details and post-commissural fornix FA (Steiger  $z(27) = 1.78$ ,  $p = 0.038$ ). The  
381 correlation between episodic future details and pre-commissural fornix FA was not  
382 significantly greater than between external future details and pre-commissural fornix  
383 FA, however, when controlling for the number of external details given the correlation  
384 between episodic future details and pre-commissural fornix FA remained significant  
385 (Pearson's  $r = 0.38$ ,  $p = 0.028$ , Spearman's  $\rho = 0.33$ ,  $p = 0.0499$ ).

386

### 387 **Influence of grey matter volume**

388 When hippocampal volume was controlled for, the correlation between past episodic  
389 details and pre-commissural fornix FA remained significant (partial correlation:  
390 Pearson's  $r = 0.49$ ,  $p = 0.006$ ), and there was no significant association between  
391 post-commissural fornix FA and episodic past details (partial correlation: Pearson's  $r$   
392  $= -0.09$ ,  $p = 0.341$ ). Likewise, the correlation between future episodic details and pre-  
393 commissural fornix FA remained significant when controlling for hippocampal volume  
394 (partial correlation: Pearson's  $r = 0.37$ ,  $p = 0.035$ ), and there was no significant  
395 association between post-commissural fornix FA and episodic future details (partial  
396 correlation: Pearson's  $r = 0.04$ ,  $p = 0.422$ ).

397

398 Similarly, when vmPFC volume was controlled for, the correlation between past  
399 episodic details and pre-commissural fornix FA remained significant (partial  
400 correlation: Pearson's  $r = 0.54$ ,  $p = 0.003$ ), and there was no significant correlation  
401 between post-commissural fornix FA and past episodic details (partial correlation:  
402 Pearson's  $r = -0.22$ ,  $p = 0.143$ ). For the future simulations, the correlation between  
403 the number of episodic details and pre-commissural fornix FA remained significant

404 when controlling for vmPFC volume (partial correlation: Pearson's  $r = 0.36$ ,  $p =$   
405  $0.037$ ), and there was no significant correlation between post-commissural fornix FA  
406 and episodic future details (partial correlation: Pearson's  $r = -0.19$ ,  $p = 0.178$ ).

407

## 408 **Discussion**

409 We applied a novel anatomically-guided protocol that allows the pre-commissural  
410 and post-commissural fornix fibers to be separately reconstructed *in vivo*  
411 (Christiansen et al., 2016). To assess both past- and future-oriented thinking, we  
412 used an adapted autobiographical cueing paradigm (Crovitz and Schiffman, 1974;  
413 Cole et al., 2012) alongside a validated coding scheme that specifically parses  
414 episodic from non-episodic detail within individuals' real-world descriptions (Levine et  
415 al., 2002). Using this approach, we found that inter-individual variation in *pre-*  
416 *commissural*, but not *post-commissural*, fornix microstructure was significantly  
417 correlated with the amount of episodic detail produced during the construction of  
418 both past and future events. Critically, this effect was still seen when controlling for  
419 non-episodic content. These findings deepen our understanding of hippocampal-  
420 vmPFC interactions in human episodic autobiographical memory and future thinking  
421 and provide a 'structural realization' of hippocampal-vmPFC functional connectivity  
422 (Kosslyn and Van Kleeck, 1990), that is, a direct relationship between the  
423 microstructure of the fiber pathway connecting these distributed regions and  
424 individual differences in the episodic content of past and future thinking.

425

426 Our findings highlight the importance of hippocampus-vmPFC structural connectivity  
427 mediated by the pre-commissural fornix (Cenquizca and Swanson, 2007; Aggleton et  
428 al., 2015), in episodic construction across past and future events. This builds upon  
429 previous fMRI studies that have shown that functional coupling between these  
430 distributed regions is increased during both the retrieval of autobiographical  
431 memories and the construction of future events (McCormick et al., 2015; Campbell et  
432 al., 2017). One recent study, which used structural equation modelling of fMRI data,  
433 found increased functional connectivity from anterior hippocampus *to* vmPFC when  
434 participants retrieved autobiographical memories in response to cue words  
435 (McCormick et al., 2015). Similarly, another investigation applied dynamic causal  
436 modeling to fMRI data and found that anterior hippocampus *to* vmPFC effective  
437 connectivity increased specifically during the initial construction of episodic future

438 events (Campbell et al., 2017). From this, the authors proposed that ‘the  
439 hippocampus initiates event construction in response to retrieval cues, which then  
440 drives activation in the vmPFC where episodic details may be further integrated’.

441

442 This conceptualization is consistent with previous work in both humans and rodents  
443 that demonstrated that hippocampal activity precedes medial PFC activity during  
444 memory retrieval (McCormick et al., 2015; Place et al., 2016), and with findings in  
445 rodents that hippocampus mediates theta drive to vmPFC (O'Neill et al., 2013).  
446 Optogenetic studies in mice (e.g. Ciochi et al., 2015) have also shown that during  
447 memory retrieval ventral hippocampal signals carrying contextual information are  
448 sent directly to medial PFC, facilitating coordinated activity between these areas.

449

450 The differential contributions of the hippocampus and vmPFC to episodic  
451 constructive processes are hotly debated (Robin and Moscovitch, 2017; Schacter et  
452 al., 2017; McCormick et al., 2018). According to scene construction theory, the  
453 hippocampus, and particularly the subiculum, plays a central role in forming  
454 representations of spatially coherent scenes across memory, perception and  
455 imagination (Zeidman and Maguire, 2016; Hodgetts et al., 2017b), and these  
456 conjunctive scene representations have been proposed to provide a scaffold when  
457 constructing both past and future events (Murray et al., 2017; Robin, 2018; Barry and  
458 Maguire, 2019). In contrast, the constructive episodic simulation hypothesis  
459 contends that the construction of spatiotemporal contexts arises out of a more  
460 general relational processing mechanism (Eichenbaum and Cohen, 2014) housed in  
461 hippocampus, which is also responsible for the integration of other event details into  
462 the event representation (Schacter et al., 2012; Schacter et al., 2017; Addis, 2018).

463 The vmPFC's contribution to episodic construction, by contrast, has been linked to  
464 demands on schematic representations (van Kesteren et al., 2012; Gilboa and  
465 Marlatte, 2017; Robin and Moscovitch, 2017), in particular the self-schema (Buckner  
466 and Carroll, 2007; D'Argembeau, 2013). For instance, Kurczek et al. (2015) (see also  
467 Verfaellie et al., 2019) compared the number of references to ‘the self’ included in  
468 autobiographical event narratives from patients with bilateral hippocampal or medial  
469 PFC damage as well as healthy controls. Patients with medial PFC damage, despite  
470 being able to construct highly detailed episodic events, produced relatively few self-  
471 references, and they incorporated themselves in the narratives of their

472 (re)constructions less frequently than the healthy participants. Patients with  
473 hippocampal damage showed the opposite pattern: they were impaired in their ability  
474 to construct highly detailed episodic events across time periods but not in their  
475 incorporation of the self. We have previously suggested (Murray et al., 2017) that  
476 hippocampal-vmPFC connectivity serves to (re)create complex conjunctive  
477 representations in which one's self is oriented in a particular time, place, and overall  
478 situational context (Murray et al., 2017). These conjunctive representations may  
479 subsequently constrain further retrieval and construction by the hippocampus  
480 (Graham et al., 2010; Preston and Eichenbaum, 2013; Place et al., 2016; Campbell  
481 et al., 2017). Thus, recall/imagination of personally relevant episodes involves a  
482 prefrontal system that can work in conjunction with the MTL system to help  
483 individuals recombine episodic details to construct a *personally relevant* past/future  
484 event (but see scene construction theory - McCormick et al., 2018; Barry and  
485 Maguire, 2019; Ciaramelli et al., 2019 - for an alternative account of vmPFC  
486 contributions that de-emphasizes self-processes).

487

488 Critically, the pre-commissural fornix does not carry reciprocal projections from the  
489 vmPFC to the hippocampus (which are indirect via the thalamic nucleus reuniens  
490 and entorhinal cortex) (Aggleton et al., 2010; Preston and Eichenbaum, 2013;  
491 Murray et al., 2017), but only carries connections to the vmPFC from the  
492 hippocampus (subiculum/CA1) (Cenquizca and Swanson, 2007; Aggleton et al.,  
493 2015). While several models of episodic memory emphasize the importance of bi-  
494 directional interactions between hippocampus and vmPFC (e.g. Preston and  
495 Eichenbaum, 2013; Eichenbaum, 2017; Robin and Moscovitch, 2017), with vmPFC  
496 playing a regulatory (Preston and Eichenbaum, 2013; Eichenbaum, 2017; Robin and  
497 Moscovitch, 2017; Barry and Maguire, 2019) or even initiating (McCormick et al.,  
498 2018; Barry et al., 2019) role in episodic construction, our findings reveal that the  
499 direct inputs that the hippocampus provides to vmPFC are critical in individual  
500 differences for episodic memory and future thinking, and that the pre-commissural  
501 fornix is a key link in this broader hippocampal-vmPFC circuit.

502

503 While our findings highlight a key role for hippocampal structural connectivity with  
504 medial PFC in constructing self-relevant event representations, previous work in  
505 humans, primates and rodents has tended to emphasize the importance of

506 connectivity between the hippocampus and medial diencephalon (i.e., mammillary  
507 bodies and thalamus) in spatial and contextual memory (Parker and Gaffan, 1997;  
508 Aggleton and Brown, 1999), connectivity which is mediated by the *post-* but not the  
509 *pre*-commissural fornix (Vann and Nelson, 2015; Christiansen et al., 2016;  
510 Mathiasen et al., 2019). While the current findings seemingly challenge this account,  
511 one caveat is that our post-commissural fornix tract reconstructions principally  
512 involve the connections of the hippocampus with the hypothalamus, including the  
513 mammillary bodies, and largely exclude the projections to the anterior thalamic  
514 nuclei, as these turn towards posterior regions as the fornix columns descend  
515 (Poletti and Creswell, 1977; Christiansen et al., 2016). These thalamic fibers do not  
516 form a discrete tract, rather they remain diffuse (Mathiasen et al., 2019). Previous  
517 work has demonstrated that thalamic degeneration can impair episodic  
518 autobiographical memory and future thinking (Irish et al., 2013). Notably, however,  
519 Vann and colleagues (Vann et al., 2011; Vann, 2013) have reported that lesions to  
520 the descending post-commissural fornix columns in rats have little impact on spatial  
521 memory tests that are sensitive to mammillary body, mammillothalamic tract, anterior  
522 thalamic, and hippocampal lesions. The implication of this finding is that the  
523 hippocampal-mammillary connection may not be important for all forms of episodic  
524 memory, including (as here) those that place demand on constructive and self-  
525 referential processing (see also Tedder et al., 2016) (but see Christiansen et al.,  
526 2016).

527

528 Although FA is highly sensitive to the microstructure of fibers, it lacks biological  
529 specificity, and may reflect myelination, axon diameter and packing density, axon  
530 permeability and fiber geometry (Jones et al., 2013). Concha et al. (2010), using  
531 human DTI-histology comparisons, found that FA of the fornix was strongly positively  
532 correlated with axonal membranes (cumulative membrane circumference) and  
533 axonal density. Variation in such microstructural properties can influence  
534 communication efficiency and synchronicity between distal brain regions (Jbabdi and  
535 Behrens, 2013; Pajevic et al., 2014). Future studies using multi-shell diffusion MRI  
536 and advanced biophysical modeling to estimate specific microstructural properties  
537 including axon density (Assaf et al., 2017) will provide further insight into the specific  
538 biological attributes underlying these microstructure-cognition associations. Further,  
539 while our sample size was comparable to related investigations (e.g. Postans et al.,

540 2014; Palombo et al., 2018b), and VS-MPRs showed that our findings provide a  
541 good level of diagnosticity (Benjamin and Berger, 2019), it will be important to extend  
542 our findings to larger lifespan samples.

543

544 In summary, we report a novel association between white matter microstructure of  
545 the pre-commissural fornix and episodic past and future thinking, thus elucidating a  
546 potential anatomical mechanism by which direct hippocampal-to-vmPFC connectivity  
547 supports constructive episodic processing. These findings provide important support  
548 for the idea of a core-network supporting both the re-construction of past events and  
549 the construction of hypothetical events in the future, and that individual differences in  
550 structural connectivity may reflect how richly people can reconstruct the past and  
551 construct possible futures.

552

## 553 **References**

- 554 Addis DR (2018) Are episodic memories special? On the sameness of remembered  
555 and imagined event simulation. *Journal of the Royal Society of New Zealand*  
556 48:64-88.
- 557 Addis DR, Wong AT, Schacter DL (2007) Remembering the past and imagining the  
558 future: common and distinct neural substrates during event construction and  
559 elaboration. *Neuropsychologia* 45:1363-1377.
- 560 Addis DR, Wong AT, Schacter DL (2008) Age-related changes in the episodic  
561 simulation of future events. *Psychological Science* 19:33-41.
- 562 Addis DR, Sacchetti DC, Ally BA, Budson AE, Schacter DL (2009) Episodic  
563 simulation of future events is impaired in mild Alzheimer's disease.  
564 *Neuropsychologia* 47:2660-2671.
- 565 Aggleton JP (2012) Multiple anatomical systems embedded within the primate  
566 medial temporal lobe: implications for hippocampal function. *Neuroscience &*  
567 *Biobehavioral Reviews* 36:1579-1596.
- 568 Aggleton JP, Brown MW (1999) Episodic memory, amnesia, and the hippocampal–  
569 anterior thalamic axis. *Behavioral and Brain Sciences* 22:425-444.
- 570 Aggleton JP, Wright NF, Rosene DL, Saunders RC (2015) Complementary patterns  
571 of direct amygdala and hippocampal projections to the macaque prefrontal  
572 cortex. *Cerebral Cortex* 25:4351-4373.
- 573 Aggleton JP, O'Mara SM, Vann SD, Wright NF, Tsanov M, Erichsen JT (2010)  
574 Hippocampal–anterior thalamic pathways for memory: uncovering a network  
575 of direct and indirect actions. *European Journal of Neuroscience* 31:2292-  
576 2307.
- 577 Andrews-Hanna JR, Reidler JS, Sepulcre J, Poulin R, Buckner RL (2010)  
578 Functional-anatomic fractionation of the brain's default network. *Neuron*  
579 65:550-562.
- 580 Assaf Y, Johansen-Berg H, Thiebaut de Schotten M (2017) The role of diffusion MRI  
581 in neuroscience. *NMR in Biomedicine* 32:1-16.
- 582 Barbas H, Blatt GJ (1995) Topographically specific hippocampal projections target  
583 functionally distinct prefrontal areas in the rhesus monkey. *Hippocampus*  
584 5:511-533.
- 585 Barry DN, Maguire EA (2019) Remote memory and the hippocampus: a constructive  
586 critique. *Trends in Cognitive Sciences* 23:128-142.

- 587 Barry DN, Barnes GR, Clark IA, Maguire EA (2019) The neural dynamics of novel  
588 scene imagery. *Journal of Neuroscience* 39:4375-4386.
- 589 Beaulieu C (2002) The basis of anisotropic water diffusion in the nervous system—a  
590 technical review. *NMR in Biomedicine* 15:435-455.
- 591 Bellana B, Liu ZX, Diamond N, Grady C, Moscovitch M (2017) Similarities and  
592 differences in the default mode network across rest, retrieval, and future  
593 imagining. *Human Brain Mapping* 38:1155-1171.
- 594 Benjamin DJ, Berger JO (2019) Three Recommendations for Improving the Use of p-  
595 Values. *The American Statistician* 73:186-191.
- 596 Benoit RG, Schacter DL (2015) Specifying the core network supporting episodic  
597 simulation and episodic memory by activation likelihood estimation.  
598 *Neuropsychologia* 75:450-457.
- 599 Buckner RL, Carroll DC (2007) Self-projection and the brain. *Trends in Cognitive*  
600 *Sciences* 11:49-57.
- 601 Campbell KL, Madore KP, Benoit RG, Thakral PP, Schacter DL (2017) Increased  
602 hippocampus to ventromedial prefrontal connectivity during the construction of  
603 episodic future events. *Hippocampus*:1-5.
- 604 Cenquizca LA, Swanson LW (2007) Spatial organization of direct hippocampal field  
605 CA1 axonal projections to the rest of the cerebral cortex. *Brain Research*  
606 *Reviews* 56:1-26.
- 607 Christiansen K, Aggleton JP, Parker GD, O'sullivan MJ, Vann SD, Metzler-Baddeley  
608 C (2016) The status of the precommissural and postcommissural fornix in  
609 normal ageing and mild cognitive impairment: an MRI tractography study.  
610 *NeuroImage* 130:35-47.
- 611 Ciaramelli E, De Luca F, Monk AM, McCormick C, Maguire EA (2019) What "wins" in  
612 VMPFC: scenes, situations, or schema? *Neuroscience & Biobehavioral*  
613 *Reviews* 100:208-210.
- 614 Ciocchi S, Passecker J, Malagon-Vina H, Mikus N, Klausberger T (2015) Selective  
615 information routing by ventral hippocampal CA1 projection neurons. *Science*  
616 348:560-563.
- 617 Cole SN, Gill NC, Conway MA, Morrison CM (2012) Rapid communication: Mental  
618 time travel: Effects of trial duration on episodic and semantic content.  
619 *Quarterly Journal of Experimental Psychology* 65:2288-2296.



- 620 Concha L, Gross DW, Beaulieu C (2005) Diffusion tensor tractography of the limbic  
621 system. *American Journal of Neuroradiology* 26:2267-2274.
- 622 Concha L, Livy DJ, Beaulieu C, Wheatley BM, Gross DW (2010) In vivo diffusion  
623 tensor imaging and histopathology of the fimbria-fornix in temporal lobe  
624 epilepsy. *Journal of Neuroscience* 30:996-1002.
- 625 Croux C, Dehon C (2010) Influence functions of the Spearman and Kendall  
626 correlation measures. *Statistical Methods & Applications* 19:497-515.
- 627 Crovitz HF, Schiffman H (1974) Frequency of episodic memories as a function of  
628 their age. *Bulletin of the Psychonomic Society* 4:517-518.
- 629 Croxson PL, Johansen-Berg H, Behrens TE, Robson MD, Pinski MA, Gross CG,  
630 Richter W, Richter MC, Kastner S, Rushworth MF (2005) Quantitative  
631 investigation of connections of the prefrontal cortex in the human and  
632 macaque using probabilistic diffusion tractography. *Journal of Neuroscience*  
633 25:8854-8866.
- 634 D'Argembeau A (2013) On the role of the ventromedial prefrontal cortex in self-  
635 processing: the valuation hypothesis. *Frontiers in Human Neuroscience* 7:1-  
636 13.
- 637 Dell'Acqua F, Tournier JD (2019) Modelling white matter with spherical  
638 deconvolution: how and why? *NMR in Biomedicine* 32:1-18.
- 639 Destrieux C, Fischl B, Dale A, Halgren E (2010) Automatic parcellation of human  
640 cortical gyri and sulci using standard anatomical nomenclature. *NeuroImage*  
641 53:1-15.
- 642 Diedenhofen B, Musch J (2015) cocor: a comprehensive solution for the statistical  
643 comparison of correlations. *PLOS One* 10:e0121945.
- 644 Eichenbaum H (2017) Prefrontal-hippocampal interactions in episodic memory.  
645 *Nature Reviews Neuroscience* 18:547.
- 646 Eichenbaum H, Cohen NJ (2014) Can we reconcile the declarative memory and  
647 spatial navigation views on hippocampal function? *Neuron* 83:764-770.
- 648 Gilboa A, Marlatte H (2017) Neurobiology of schemas and schema-mediated  
649 memory. *Trends in Cognitive Sciences* 21:618-631.
- 650 Graham KS, Barense MD, Lee AC (2010) Going beyond LTM in the MTL: a  
651 synthesis of neuropsychological and neuroimaging findings on the role of the  
652 medial temporal lobe in memory and perception. *Neuropsychologia* 48:831-  
653 853.

- 654 Hodgetts CJ, Postans M, Warne N, Varnava A, Lawrence AD, Graham KS (2017a)  
655 Distinct contributions of the fornix and inferior longitudinal fasciculus to  
656 episodic and semantic autobiographical memory. *Cortex* 94:1-14.
- 657 Hodgetts CJ, Voets NL, Thomas AG, Clare S, Lawrence AD, Graham KS (2017b)  
658 Ultra-high-field fMRI reveals a role for the subiculum in scene perceptual  
659 discrimination. *Journal of Neuroscience* 37:3150-3159.
- 660 Irish M, Hodges JR, Piguet O (2013) Episodic future thinking is impaired in the  
661 behavioural variant of frontotemporal dementia. *Cortex* 49:2377-2388.
- 662 JASP (2018) JASP Team (Version 0.9.1.0) [Computer software]. In.
- 663 Jay TM, Witter MP (1991) Distribution of hippocampal CA1 and subicular efferents in  
664 the prefrontal cortex of the rat studied by means of anterograde transport of  
665 Phaseolus vulgaris-leucoagglutinin. *Journal of Comparative Neurology*  
666 313:574-586.
- 667 Jbabdi S, Behrens TE (2013) Long-range connectomics. *Annals of the New York*  
668 *Academy of Sciences* 1305:83-93.
- 669 Jeurissen B, Leemans A, Jones DK, Tournier JD, Sijbers J (2011) Probabilistic fiber  
670 tracking using the residual bootstrap with constrained spherical deconvolution.  
671 *Human Brain Mapping* 32:461-479.
- 672 Jones DK, Cercignani M (2010) Twenty-five pitfalls in the analysis of diffusion MRI  
673 data. *NMR in Biomedicine* 23:803-820.
- 674 Jones DK, Knösche TR, Turner R (2013) White matter integrity, fiber count, and  
675 other fallacies: the do's and don'ts of diffusion MRI. *NeuroImage* 73:239-254.
- 676 Kosslyn SM, Van Kleeck M (1990) Broken brains and normal minds: why Humpty-  
677 Dumpty needs a skeleton. In: *Computational neuroscience* (Schwartz E, ed),  
678 pp 390-402. Cambridge, MA: MIT Press.
- 679 Kurczek J, Wechsler E, Ahuja S, Jensen U, Cohen NJ, Tranel D, Duff M (2015)  
680 Differential contributions of hippocampus and medial prefrontal cortex to self-  
681 projection and self-referential processing. *Neuropsychologia* 73:116-126.
- 682 Lakens D (2016) One-sided tests: Efficient and underused [Blog post]. In.
- 683 Leemans A, Jones DK (2009) The B-matrix must be rotated when correcting for  
684 subject motion in DTI data. *Magnetic Resonance in Medicine* 61:1336-1349.

- 685 Levine B, Svoboda E, Hay JF, Winocur G, Moscovitch M (2002) Aging and  
686 autobiographical memory: dissociating episodic from semantic retrieval.  
687 *Psychology and Aging* 17:677-689.
- 688 Mathiasen ML, Louch RC, Nelson AD, Dillingham CM, Aggleton JP (2019) Trajectory  
689 of hippocampal fibres to the contralateral anterior thalamus and mammillary  
690 bodies in rats, mice, and macaque monkeys. *Brain and Neuroscience*  
691 *Advances* 3:1-18.
- 692 McCormick C, Ciaramelli E, De Luca F, Maguire EA (2018) Comparing and  
693 contrasting the cognitive effects of hippocampal and ventromedial prefrontal  
694 cortex damage: a review of human lesion studies. *Neuroscience* 374:295–  
695 318.
- 696 McCormick C, St-Laurent M, Ty A, Valiante TA, McAndrews MP (2015) Functional  
697 and effective hippocampal–neocortical connectivity during construction and  
698 elaboration of autobiographical memory retrieval. *Cerebral Cortex* 25:1297-  
699 1305.
- 700 Metzler-Baddeley C, Jones DK, Belaroussi B, Aggleton JP, O'Sullivan MJ (2011)  
701 Frontotemporal connections in episodic memory and aging: a diffusion MRI  
702 tractography study. *Journal of Neuroscience* 31:13236-13245.
- 703 Murray EA, Wise SP, Graham KS (2017) *The evolution of memory systems:  
704 ancestors, anatomy, and adaptations*. Oxford, UK: Oxford University Press.
- 705 O'Neill P-K, Gordon JA, Sigurdsson T (2013) Theta oscillations in the medial  
706 prefrontal cortex are modulated by spatial working memory and synchronize  
707 with the hippocampus through its ventral subregion. *Journal of Neuroscience*  
708 33:14211-14224.
- 709 Pajevic S, Basser PJ, Fields RD (2014) Role of myelin plasticity in oscillations and  
710 synchrony of neuronal activity. *Neuroscience* 276:135-147.
- 711 Palombo DJ, Sheldon S, Levine B (2018a) Individual differences in autobiographical  
712 memory. *Trends in Cognitive Sciences* 22:583-597.
- 713 Palombo DJ, Bacopulos A, Amaral RS, Olsen RK, Todd RM, Anderson AK, Levine B  
714 (2018b) Episodic autobiographical memory is associated with variation in the  
715 size of hippocampal subregions. *Hippocampus* 28:69-75.
- 716 Parker A, Gaffan D (1997) Mammillary body lesions in monkeys impair object-in-place  
717 memory: functional unity of the fornix-mammillary system. *Journal of cognitive*  
718 *Neuroscience* 9:512-521.

- 719 Pasternak O, Sochen N, Gur Y, Intrator N, Assaf Y (2009) Free water elimination  
720 and mapping from diffusion MRI. *Magnetic Resonance in Medicine* 62:717-  
721 730.
- 722 Pasternak O, Maier-Hein K, Baumgartner C, Shenton ME, Rathi Y, Westin C-F  
723 (2014) The estimation of free-water corrected diffusion tensors. In:  
724 Visualization and processing of tensors and higher order descriptors for multi-  
725 valued data (Westin CF, Vilanova A, Burgeth B, eds), pp 249-270. Berlin,  
726 Heidelberg: Springer.
- 727 Patenaude B, Smith SM, Kennedy DN, Jenkinson M (2011) A Bayesian model of  
728 shape and appearance for subcortical brain segmentation. *NeuroImage*  
729 56:907-922.
- 730 Pierpaoli C, Jezzard P, Basser PJ, Barnett A, Di Chiro G (1996) Diffusion tensor MR  
731 imaging of the human brain. *Radiology* 201:637-648.
- 732 Place R, Farovik A, Brockmann M, Eichenbaum H (2016) Bidirectional prefrontal-  
733 hippocampal interactions support context-guided memory. *Nature*  
734 *Neuroscience* 19:992-996.
- 735 Poletti CE, Creswell G (1977) Fornix system efferent projections in the squirrel  
736 monkey: an experimental degeneration study. *Journal of Comparative*  
737 *Neurology* 175:101-127.
- 738 Postans M, Hodgetts CJ, Mundy ME, Jones DK, Lawrence AD, Graham KS (2014)  
739 Interindividual variation in fornix microstructure and macrostructure is related  
740 to visual discrimination accuracy for scenes but not faces. *Journal of*  
741 *Neuroscience* 34:12121-12126.
- 742 Powell T, Guillery R, Cowan W (1957) A quantitative study of the fornixmamillo-  
743 thalamic system. *Journal of Anatomy* 91:419-437.
- 744 Preston AR, Eichenbaum H (2013) Interplay of hippocampus and prefrontal cortex in  
745 memory. *Current Biology* 23:R764-R773.
- 746 Race E, Keane MM, Verfaellie M (2011) Medial temporal lobe damage causes  
747 deficits in episodic memory and episodic future thinking not attributable to  
748 deficits in narrative construction. *Journal of Neuroscience* 31:10262-10269.
- 749 Raichle ME (2015) The brain's default mode network. *Annual Review of*  
750 *Neuroscience* 38:433-447.
- 751 Robin J (2018) Spatial scaffold effects in event memory and imagination. *Wiley*  
752 *Interdisciplinary Reviews: Cognitive Science* 9:1-15.

- 753 Robin J, Moscovitch M (2017) Details, gist and schema: hippocampal–neocortical  
754 interactions underlying recent and remote episodic and spatial memory.  
755 *Current Opinion in Behavioral Sciences* 17:114-123.
- 756 Saunders RC, Aggleton JP (2007) Origin and topography of fibers contributing to the  
757 fornix in macaque monkeys. *Hippocampus* 17:396-411.
- 758 Schacter DL, Benoit RG, Szpunar KK (2017) Episodic future thinking: mechanisms  
759 and functions. *Current Opinion in Behavioral Sciences* 17:41-50.
- 760 Schacter DL, Addis DR, Hassabis D, Martin VC, Spreng RN, Szpunar KK (2012) The  
761 future of memory: remembering, imagining, and the brain. *Neuron* 76:677-  
762 694.
- 763 Squire LR, van der Horst AS, McDuff SG, Frascino JC, Hopkins RO, Mauldin KN  
764 (2010) Role of the hippocampus in remembering the past and imagining the  
765 future. *Proceedings of the National Academy of Sciences* 107:19044-19048.
- 766 Tedder J, Miller L, Tu S, Hornberger M, Lah S (2016) Into the future with little past:  
767 exploring mental time travel in a patient with damage to the mammillary  
768 bodies/fornix. *The Clinical Neuropsychologist* 30:334-349.
- 769 van Kesteren MT, Ruitter DJ, Fernández G, Henson RN (2012) How schema and  
770 novelty augment memory formation. *Trends in Neurosciences* 35:211-219.
- 771 Vann SD (2013) Dismantling the Papez circuit for memory in rats. *Elife* 2:1-21.
- 772 Vann SD, Nelson AJ (2015) The mammillary bodies and memory: more than a  
773 hippocampal relay. *Progress in Brain Research* 219:163-185.
- 774 Vann SD, Erichsen JT, O'Mara SM, Aggleton JP (2011) Selective disconnection of  
775 the hippocampal formation projections to the mammillary bodies produces  
776 only mild deficits on spatial memory tasks: implications for fornix function.  
777 *Hippocampus* 21:945-957.
- 778 Verfaellie M, Wank AA, Reid AG, Race E, Keane MM (2019) Self-related processing  
779 and future thinking: distinct contributions of ventromedial prefrontal cortex and  
780 the medial temporal lobes. *Cortex* 115:159-171.
- 781 Yang X-F, Bossmann J, Schiffhauer B, Jordan M, Immordino-Yang MH (2013)  
782 Intrinsic default mode network connectivity predicts spontaneous verbal  
783 descriptions of autobiographical memories during social processing. *Frontiers*  
784 *in Psychology* 3:1-10.
- 785 Zeidman P, Maguire EA (2016) Anterior hippocampus: the anatomy of perception,  
786 imagination and episodic memory. *Nature Reviews Neuroscience* 17:173-182.

787 Zhang Y, Brady M, Smith S (2001) Segmentation of brain MR images through a  
788 hidden Markov random field model and the expectation-maximization  
789 algorithm. IEEE Transactions on Medical Imaging 20:45-57.  
790
